# Supplementary material
Source: PubMed Central journal article supplement (PMC3108461)
Supplement: NIHMS295700-supplement-Suppl__Figures.pdf [file NIHMS295700-supplement-Suppl__Figures.pdf]

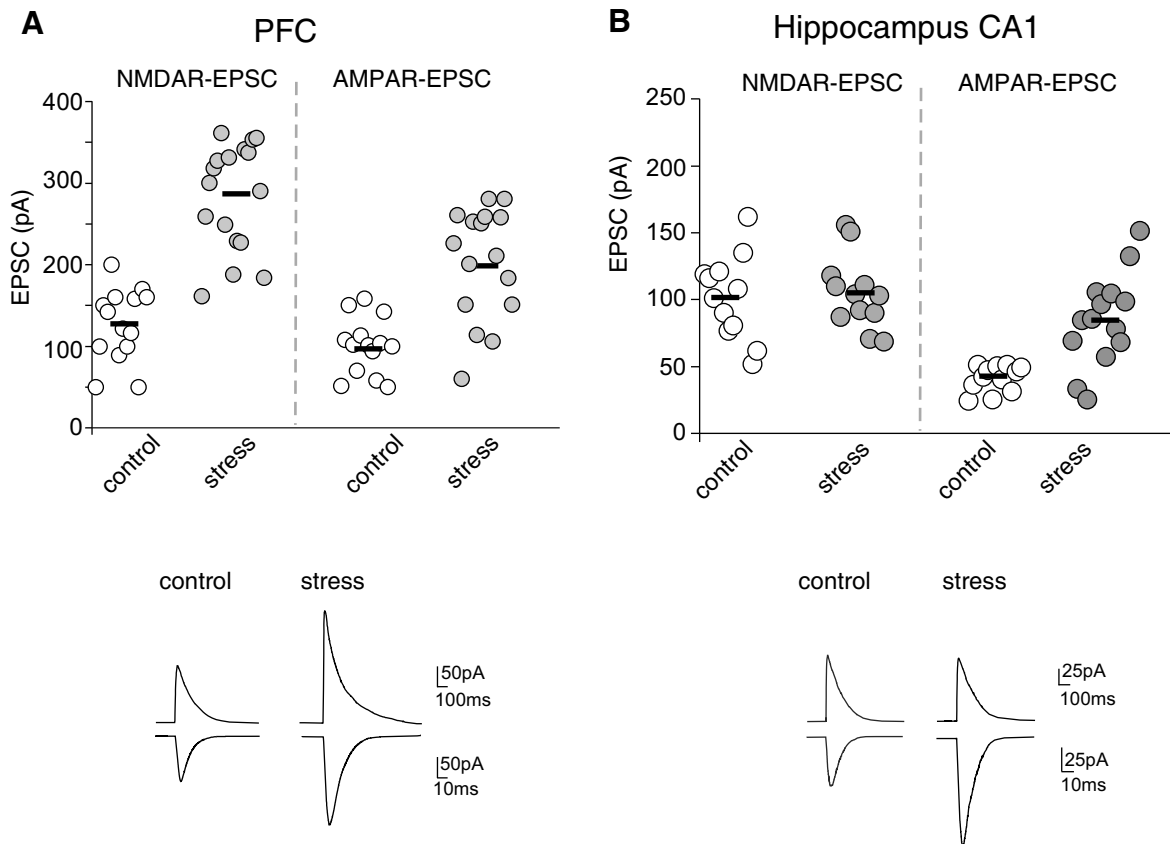

**Supplemental Figure 1. Recordings of AMPAR- and NMDAR-mediated EPSCs in the same cells from PFC or hippocampus.**

Neurons were held at -70 mV to obtain AMPAR-EPSC, followed by +40mV with addition of CNQX (20 $\mu$ M) to record NMDAR-EPSC. Bicuculline (10 $\mu$ M) was present throughout the recording. One neuron per slice was recorded and extensive wash was performed between recordings to prevent contamination of receptor antagonists.

**A.** In PFC pyramidal neurons, acute stress significantly increased both NMDAR-EPSC (control:  $126.2 \pm 11.9$  pA,  $n=14$ ; stressed:  $282 \pm 16$  pA,  $n=17$ ;  $p < 0.001$ ,  $t$  test) and AMPAR-EPSC (control:  $100.1 \pm 9.2$  pA,  $n=14$ ; stressed:  $198.9 \pm 16.4$  pA,  $n=17$ ;  $p < 0.001$ ,  $t$  test) to a similar extent. **B.** In CA1 pyramidal neurons, acute stress only increased AMPAR-EPSC significantly (control:  $42.0 \pm 9.1$  pA,  $n=12$ ; stressed:  $85.6 \pm 9.2$  pA,  $n=16$ ;  $p < 0.001$ ,  $t$  test), while left NMDAR-EPSC unchanged (control:  $102.0 \pm 9.1$  pA,  $n=12$ ; stressed:  $104 \pm 7.8$  pA,  $n=12$ ;  $p > 0.05$ ,  $t$  test).

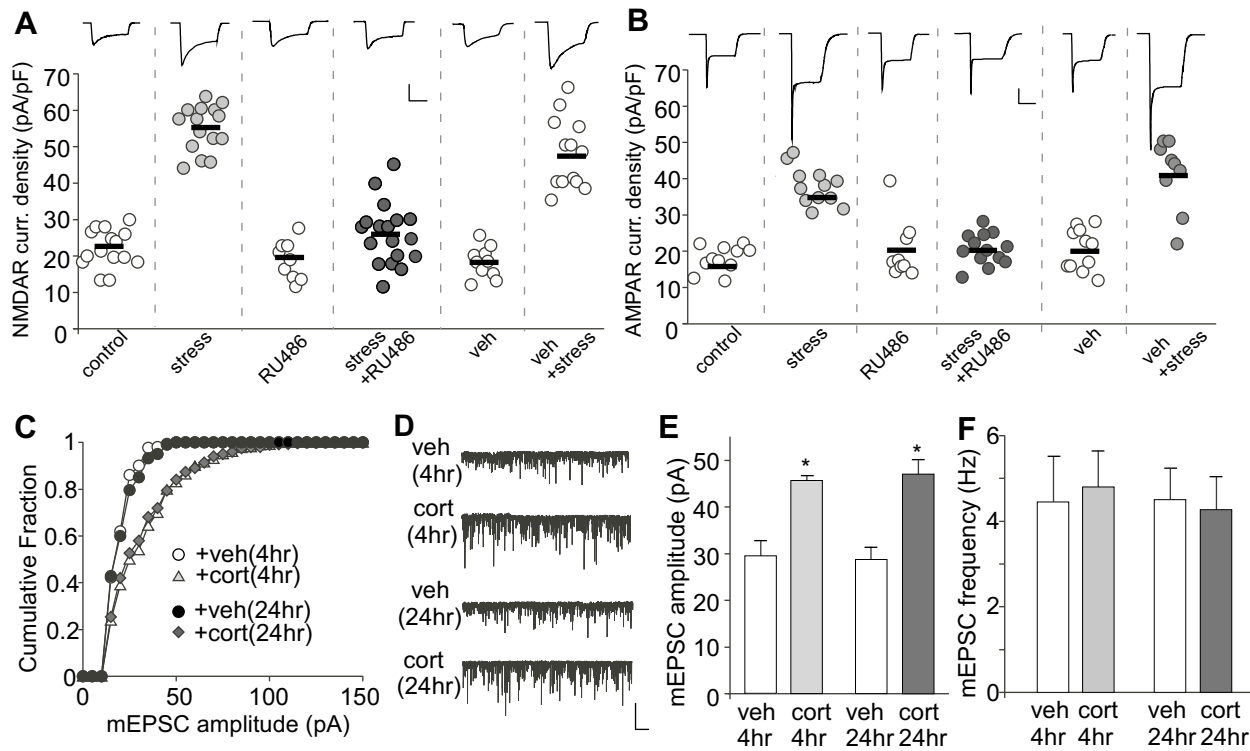

**Supplemental Figure 2. AMPAR- and NMDAR-mediated ionic currents and mEPSC after acute stress or corticosterone treatment.** **A,B.** Animals exposed to forced-swim stress had a significantly increased NMDAR and AMPAR current density (pA/pF, NMDA: control:  $22.1 \pm 1.4$ ,  $n=15$ ; stressed:  $54.9 \pm 1.6$ ,  $n=15$ ; AMPA: control:  $16.9 \pm 1.1$ ,  $n=11$ ; stressed:  $36.3 \pm 1.2$ ,  $n=12$ ;  $p < 0.001$ ,  $t$  test), which was abolished by injection (i.p.) of the GR antagonist RU486 (10 mg/kg) (NMDA: RU486:  $19.0 \pm 1.7$ ,  $n=9$ ; RU486+stress:  $26.2 \pm 1.9$ ,  $n=18$ ; AMPA: RU486:  $19.9 \pm 2.4$ ,  $n=10$ ; RU486+stress:  $20.5 \pm 1.2$ ,  $n=13$ ;  $p > 0.05$ ,  $t$  test), but not the vehicle (DMSO) control. **C-F.** The amplitude of mEPSC was significantly increased in PFC cultures at 4 hr or 24 hr after corticosterone treatment (4 hr: vehicle:  $29.5 \pm 3.2$  pA,  $n=8$ , cort:  $45.6 \pm 1.2$  pA,  $n=7$ ;  $p < 0.001$ ,  $t$  test; 24 hr: vehicle:  $28.7 \pm 2.7$  pA,  $n=8$ , cort:  $47.0 \pm 3.2$  pA,  $n=7$ ;  $p < 0.001$ ,  $t$  test). The mEPSC frequency was not altered by corticosterone treatment (4 hr: vehicle:  $4.5 \pm 1.1$  Hz,  $n=8$ , cort:  $4.8 \pm 0.9$  Hz,  $n=7$ ;  $p > 0.05$ ,  $t$  test; 24 hr: vehicle:  $4.5 \pm 0.7$  Hz,  $n=6$ , cort:  $4.3 \pm 0.8$  Hz,  $n=7$ ;  $p > 0.05$ ,  $t$  test).

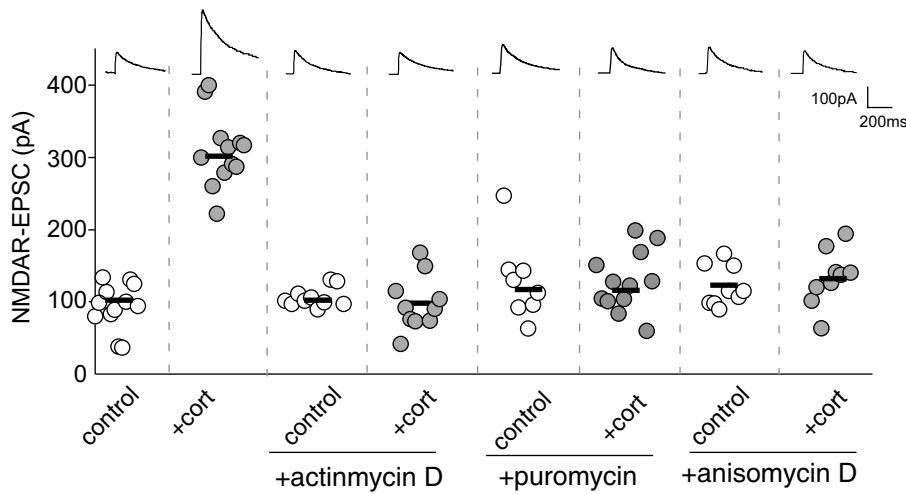

**Supplemental Figure 3. The effect of corticosterone on NMDAR-EPSC in the presence of transcription or translation inhibitors.** The enhancing effect of corticosterone (100 nM, 20 min) on NMDAR-EPSC in PFC slices (control:  $103.5 \pm 11.1$  pA,  $n=15$ ; cort:  $309 \pm 14.4$  pA,  $n=12$ ;  $p < 0.001$ , t test) was abolished by pre-treatment with the transcription inhibitor actinomycin D (50  $\mu$ M, 30 min;  $96.3 \pm 11.9$  pA,  $n=10$ ) or puromycin (100  $\mu$ M, 30 min,  $127.5 \pm 12.1$  pA,  $n=12$ ). Pre-treatment of PFC slices with translation inhibitor anisomycin D (2  $\mu$ M, 30 min) also blocked the effect of corticosterone on NMDAR-EPSC ( $132.2 \pm 12.9$  pA,  $n=9$ ).

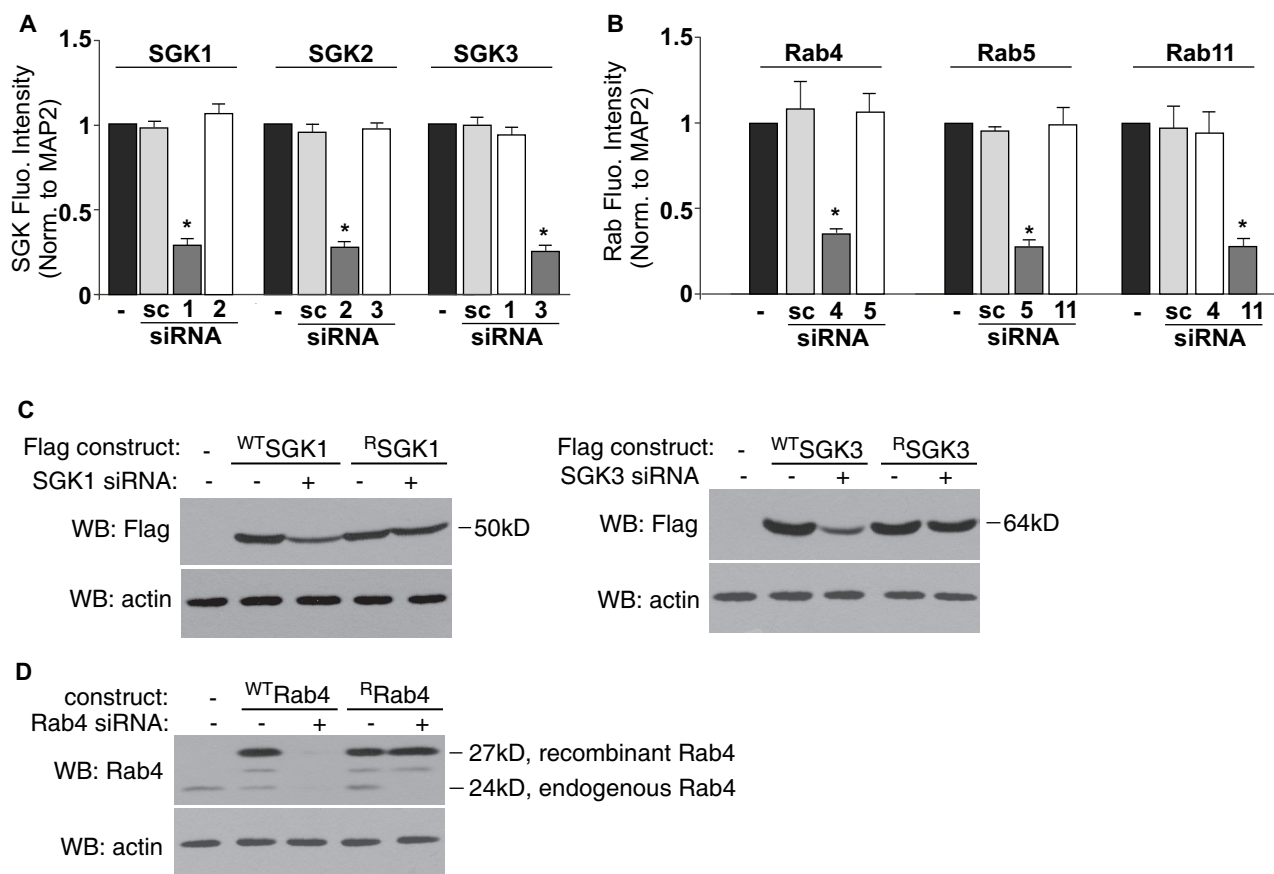

**Supplemental Figure 4. Quantification data showing the target-specific gene knockdown by various siRNAs.** PFC cultures were transfected with a scrambled control siRNA (sc) or the siRNA against SGK1-3 (A), or Rab4/5/11 (B). GFP was co-transfected. Neurons were co-stained with anti-MAP2 and an antibody against SGK1-3 or Rab4/5/11. The fluorescent intensity (normalized to MAP2) in GFP+ neurons was quantified and compared. **A.** SGK1 was reduced to  $0.29 \pm 0.04$  of control in SGK1 siRNA-transfected cells ( $n=13$ ), but not altered in cells transfected with scrambled ( $n=11$ ) or SGK2 siRNA ( $n=10$ ). SGK2 was reduced to  $0.28 \pm 0.03$  of control in SGK2 siRNA-transfected cells ( $n=12$ ), but not altered in cells transfected with scrambled ( $n=10$ ) or SGK3 siRNA ( $n=14$ ). SGK3 was reduced to  $0.27 \pm 0.04$  of control in SGK3 siRNA-transfected cells ( $n=13$ ), but was not altered in cells transfected with scrambled ( $n=10$ ) or SGK1 siRNA ( $n=13$ ). \*:  $p < 0.001$ . **B.** Rab4 was reduced to  $0.35 \pm 0.03$  of control in Rab4 siRNA-transfected cells ( $n=15$ ), but was not altered in cells transfected with scrambled ( $n=9$ ) or Rab5 siRNA ( $n=14$ ). Rab5 was reduced to  $0.19 \pm 0.02$  of control in Rab5 siRNA-transfected cells ( $n=13$ ), but was not altered in cells transfected with scrambled ( $n=11$ ) or Rab11 siRNA ( $n=9$ ). Rab11 was reduced to  $0.21 \pm 0.04$  of control in Rab11 siRNA-transfected cells ( $n=12$ ), but was not altered in cells transfected with scrambled ( $n=12$ ) or Rab4 siRNA ( $n=13$ ). \*:  $p < 0.001$ . **C, D.** Representative Western blots in HEK293 cells transfected with wild-type (WT) or siRNA-resistant (R) SGK1, SGK3 (subcloned to pcDNA3.1 vector) or Rab4 (subcloned to plenti6/V5 vector) in the absence or presence of the corresponding siRNA.

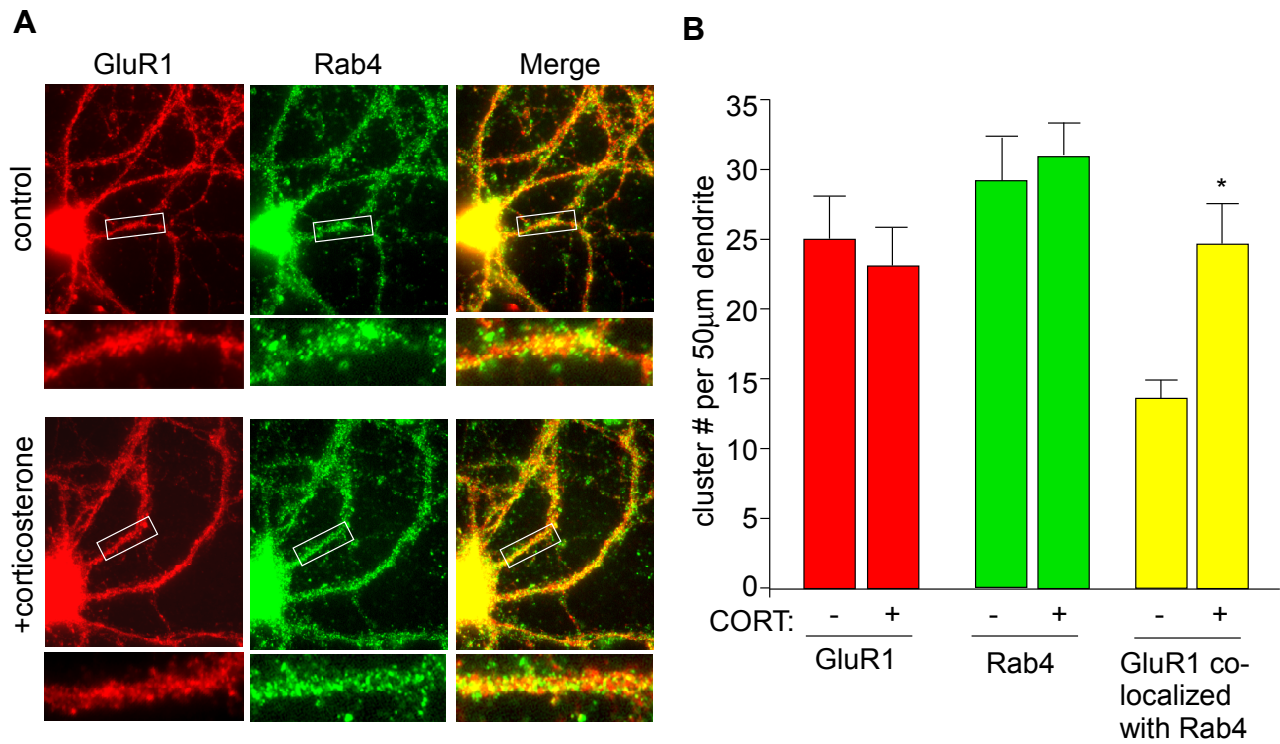

**Supplemental Figure 5. Measurement of co-localization of GluR1 and Rab4 in PFC cultures treated with or without corticosterone. A.** As indicated by yellow puncta along dendrites, AMPA receptors can be seen in Rab4-positive internal vesicles. **B.** Cort-treated neurons show more GluR1 clusters co-localized with Rab4 (control:  $13.7 \pm 1.4$ ,  $n=10$ ; CORT:  $24.8 \pm 2.9$ ,  $n=10$ ;  $p < 0.01$ ,  $t$  test). No significant changes were found with total GluR1 (control:  $25.1 \pm 3.4$ ; GluR1-CORT:  $23.2 \pm 2.7$ ,  $n=10$ ;  $p > 0.05$ ,  $t$  test) or Rab4 (control:  $29.2 \pm 3.1$ ; CORT:  $31.0 \pm 2.3$ ,  $n=10$ ;  $p > 0.05$ ,  $t$  test).

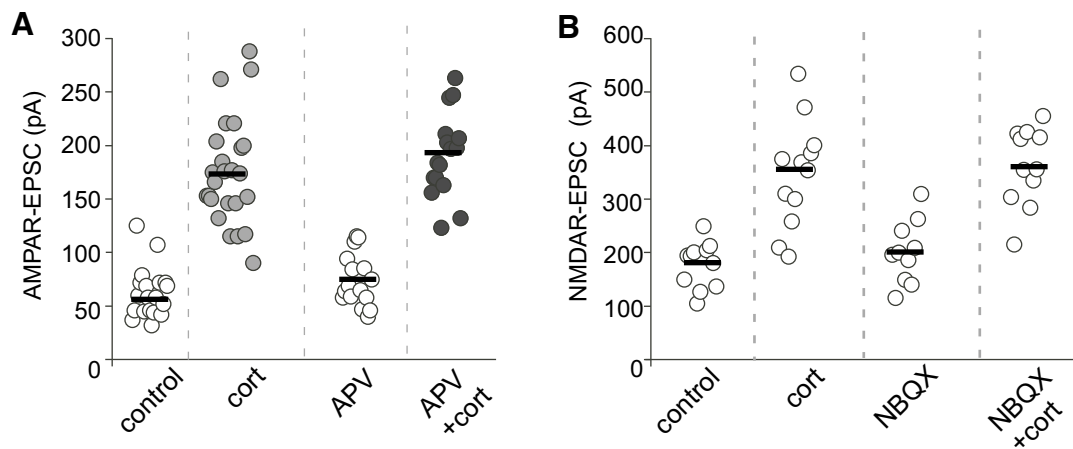

**Supplemental Figure 6. The effect of corticosterone on AMPAR-EPSC when NMDAR activation is blocked, and the effect of corticosterone on NMDAR-EPSC when AMPAR activation is blocked.** The NMDAR antagonist APV (100  $\mu$ M) or the AMPAR antagonist NBQX (10  $\mu$ M) was added 15 min before and during corticosterone treatment (20 min). Recordings were performed at 1-4 hrs after washing off these compounds. **A.** The corticosterone-induced increase of AMPAR-EPSC was not blocked by APV (APV:  $73.9 \pm 6.1$  pA,  $n=16$ ; APV+cort:  $190 \pm 9.8$  pA,  $n=16$ ,  $p < 0.001$ ,  $t$  test). **B.** The corticosterone-induced increase of NMDAR-EPSC was not blocked by NBQX (NBQX:  $203.3 \pm 18.6$  pA,  $n=10$ ; NBQX+cort:  $358.1 \pm 22.2$  pA,  $n=11$ ,  $p < 0.001$ ,  $t$  test).

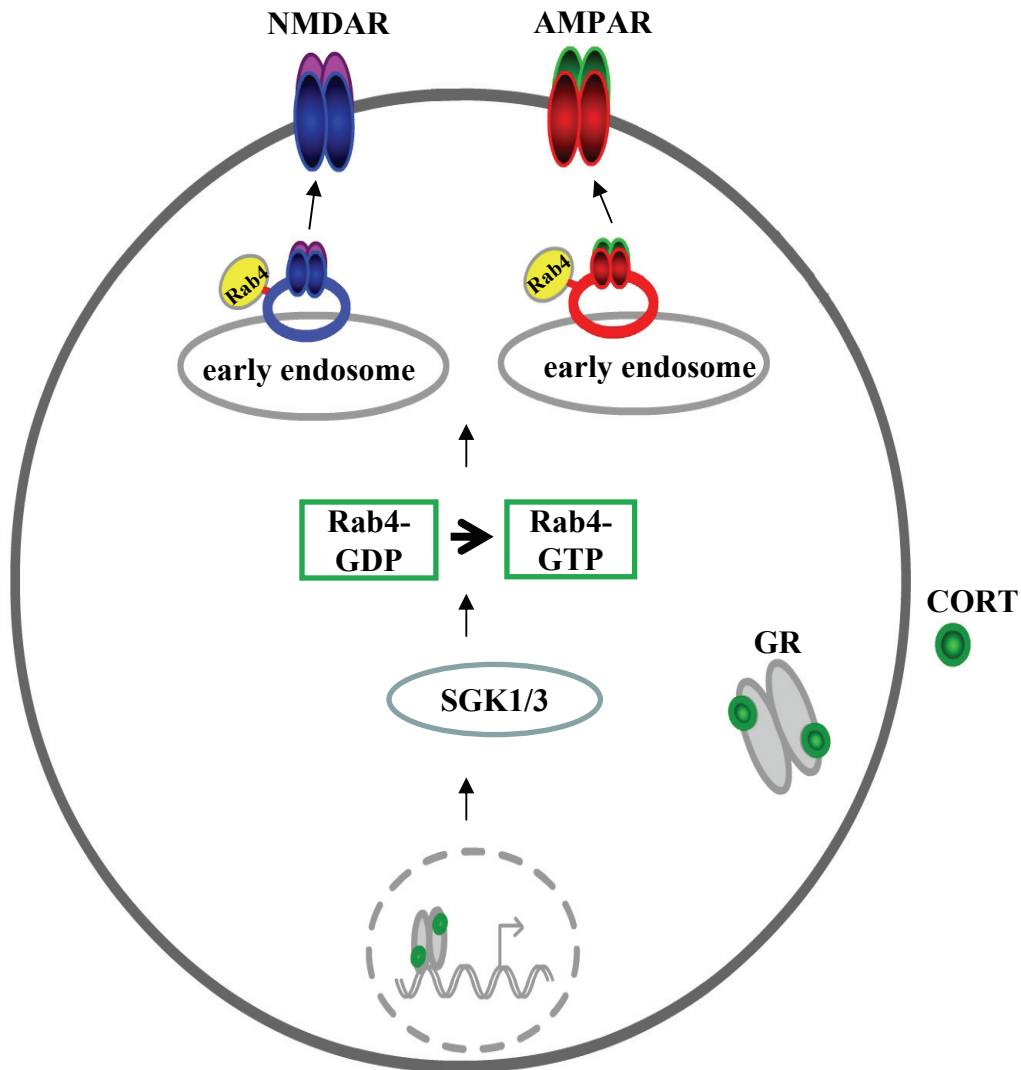

**Supplemental Figure 7. A diagram showing the potential molecular and cellular mechanism underlying corticosterone regulation of NMDAR and AMPAR trafficking and function.** Upon GR activation, SGK1/3 is upregulated, leading to the activation of Rab4. Consequently, the recycling of NMDARs and AMPARs from early endosome to plasma membrane is enhanced. The extra-synaptic glutamate receptors are moved to synaptic surface presumably via lateral diffusion. At synapses, glutamate receptors are endocytosed for recycling or degradation.
